# Supplementary material for: Impact of Pre-Transplant Anti-T Cell Globulin (ATG) on Immune Recovery after Myeloablative Allogeneic Peripheral Blood Stem Cell Transplantation
Source: PLOS journal article supplement (doi:10.1371/journal.pone.0130026), 2015-06-22
Supplement: S5 (10.1371/journal.pone.0130026.s005) [file journal.pone.0130026.s005]

**S1 Table. Numbers of serious infectious events by post-transplant time period.**

|                     | ATG                                                        | Control                                                    |          |
|---------------------|------------------------------------------------------------|------------------------------------------------------------|----------|
| Period              | Number of infections; patients with one or more infections | Number of infections; patients with one or more infections | <i>p</i> |
| <b>0-40 days</b>    |                                                            |                                                            |          |
| <b>Total</b>        | <b>53 infections; 30/34 (88%)</b>                          | <b>35 infections; 21/23 (91%)</b>                          | 0.99     |
| Bacterial           | 30 infections; 27/34 (79%)                                 | 22 infections; 18/23 (78%)                                 | 0.67     |
| Viral               | 15 infections; 13/34 (38%)                                 | 8 infections; 8/23 (35%)                                   | 0.68     |
| Fungal              | 7 infections; 7/34 (21%)                                   | 5 infections; 5/23 (22%)                                   | 0.93     |
| Parasitic           | 1 infection; 1/34 (3%)                                     | 0 infection; 0/23                                          | -        |
| <b>41-180 days</b>  |                                                            |                                                            |          |
| <b>Total</b>        | <b>30 infections; 14/29 (48%)</b>                          | <b>14 infections; 5/13 (38%)</b>                           | 0.72     |
| Bacterial           | 10 infections; 8/29 (28%)                                  | 8 infections; 3/13 (23%)                                   | 0.94     |
| Viral               | 17 infections; 8/29 (28%)                                  | 5 infections; 4/13 (31%)                                   | 0.92     |
| Fungal              | 2 infections; 2/29 (7%)                                    | 1 infection; 1/13 (8%)                                     | 0.95     |
| Parasitic           | 1 infection; 1/29 (3%)                                     | 0 infection; 0/13                                          | -        |
| <b>181-365 days</b> |                                                            |                                                            |          |
| <b>Total</b>        | <b>12 infections; 8/25 (32%)</b>                           | <b>14 infections; 7/9 (78%)</b>                            | 0.025    |
| Bacterial           | 4 infections; 4/25 (16%)                                   | 12 infections; 5/9 (56%)                                   | 0.015    |
| Viral               | 6 infections; 3/25 (12%)                                   | 1 infection; 1/9 (11%)                                     | 0.89     |
| Fungal              | 1 infection; 1/25 (4%)                                     | 1 infection; 1/9 (11%)                                     | 0.47     |
| Parasitic           | 1 infection; 1/25 (4%)                                     | 0 infection; 0/9                                           | -        |
| <b>366-730 days</b> |                                                            |                                                            |          |
| <b>Total</b>        | <b>7 infections; 7/25 (28%)</b>                            | <b>3 infections; 3/7 (43%)</b>                             | 0.48     |
| Bacterial           | 5 infections; 5/25 (20%)                                   | 2 infections; 2/7 (29%)                                    | 0.66     |
| Viral               | 2 infections; 2/25 (8%)                                    | 0 infection; 0/7                                           | -        |
| Fungal              | 0 infection; 0/25                                          | 1 infection; 1/7 (14%)                                     | -        |
| Parasitic           | 0 infection; 0/25                                          | 0 infection; 0/7                                           | -        |

Serious infectious events were analyzed in patients who survived free of progression at the end of the concerned period.
